# Supplementary material
Source: Research Square preprint supplement (doi:10.21203/rs.3.rs-9555188/v1)
Supplement: Supplementary file 1 [file 42dc649f7a5316ed8332ec9e.docx]

| Appendix Table A1. 5-yr percent changes in muscle properties and adipose tissue by gender and age | | | | | | | | | |
| --- | --- | --- | --- | --- | --- | --- | --- | --- | --- |
|  | Gender | | | Female | | | Male | | |
|  | Female  (n=72) | Male  (n=48) | P value | Age (<70)  (n=47) | Age (≥70)  (n=25) | P value | Age (<70)  (n=30) | Age (≥70)  (n=18) | P value |
| Paraspinals muscle size (%) | -2.9 (-18.7, 8.1) | -1.0 (-11.3, 9.0) | 0.09 | -2.1 (-13.2, 8.1) | -4.5 (-18.7, 6.9) | 0.19 | -0.5 (-11.2, 9.0) | -1.8 (-11.3, 3.9) | 0.42 |
| Paraspinals muscle density (%) | -13.5 (-38.3, 4.6) | -12.5 (-25.5, -2.0) | 0.48 | -15.4 (-38.3, -1.4) | -10.0 (-21.8, 4.6) | 0.02 | -10.5 (-21.5, -2.0) | -15.8 (-25.5, -6.8) | <0.01 |
| Psoas major muscle size (%) | -6.6 (-24.5, 11.5) | -10.1 (-24.5, 1.5) | 0.02 | -3.9 (-18.8, 11.6) | -11.6 (-24.5, 6.5) | <0.01 | -9.4 (-23.1, 1.5) | -11.2 (-24.5, -1.5) | 0.43 |
| Psoas major muscle density (%) | -9.9 (-19.5, 5.7) | -10.4 (-18.4, 0.4) | 0.59 | -8.9 (16.6, 5.7) | -11.6 (-19.5, -1.3) | 0.04 | -9.2 (-15.4, 0.4) | -12.2 (-18.4, -5.2) | 0.02 |
| Extensors muscle size (%) | -10.5 (-27.9, 16.2) | -7.0 (-22.3, 8.9) | 0.02 | -9.5 (-24.7, 16.2) | -12.4 (-27.9, 6.6) | 0.25 | -5.5 (-13.9, 8.9) | -9.5 (-22.3, 0.2) | 0.03 |
| Extensors muscle density (%) | -12.2 (-26.4, 7.6) | -9.0 (-16.1, 2.1) | <0.01 | -10.7 (-24.5, 7.6) | -15.1 (-26.4, -0.8) | 0.02 | -8.0 (-14.4, 2.1) | -10.7 (-16.1, -5.0) | 0.02 |
| External rotators muscle size (%) | -5.1 (-23.3, 11.5) | -3.6 (-17.4, 14.3) | 0.37 | -5.6 (-23.3, 11.5) | -4.2 (-21.3, 8.9) | 0.50 | -2.4 (-17.4, 14.3) | -5.7 (-17.1, 5.4) | 0.20 |
| External rotators muscle density (%) | -7.1 (-22.4, 4.2) | -8.5 (-14.7, 1.5) | 0.16 | -6.6 (-20.3, 4.2) | -8.2 (-22.4, 1.6) | 0.32 | -7.8 (-14.3, 1.5) | -9.5 (-14.7, -2.4) | 0.13 |
| Adductors muscle size (%) | -10.8 (-28.9, 16.3) | -12.7 (-29.6, 5.2) | 0.35 | -9.3 (-28.9, 16.3) | -13.7 (-24.9, 3.4) | 0.07 | -11.0 (-29.2, 5.2) | -15.4 (-29.6, -0.4) | 0.14 |
| Adductors muscle density (%) | 0.5 (-14.9, 19.1) | -3.1 (-14.6, 8.7) | <0.01 | 0.6 (14.9, 19.1) | 0.1 (-9.0, 7.2) | 0.76 | -2.4 (-10.4, 8.7) | -4.3 (-14.6, 1.3) | 0.25 |
| Flexors muscle size (%) | -8.7 (-26.5, 8.5) | -8.6 (-23.2, 9.8) | 0.95 | -9.1 (-26.5, 8.0) | -7.8 (-24.0, 8.5) | 0.56 | -7.4 (-17.8, 9.8) | -10.6 (-23.2, -2.0) | 0.19 |
| Flexors muscle density (%) | -1.8 (-11.8, 6.1) | -2.9 (-10.7, 4.9) | 0.15 | -1.3 (-8.9, 6.1) | -2.7 (-11.8, 5.6) | 0.26 | -1.3 (-6.8, 4.9) | -5.7 (-10.7, -1.7) | <0.01 |
| Abductors muscle size (%) | -6.0 (-23.7, 11.7) | -5.8 (-20.7, 5.8) | 0.90 | -5.3 (-21.3, 11.7) | -7.2 (-23.7, 10.1) | 0.40 | -4.9 (-15.3, 5.8) | -7.4 (-20.7, 4.8) | 0.22 |
| Abductors muscle density (%) | -4.7 (-15.8, 14.9) | -6.2 (-16.9, 4.4) | 0.20 | -3.0 (-15.8, 14.9) | -8.0 (-13.4, -0.5) | <0.01 | -4.7 (-13.2, 4.4) | -8.9 (-16.9, 1.5) | <0.01 |
| Anterior compartment of thigh muscle size (%) | -15.8 (-28.4, -0.6) | -8.8 (-22.5, 9.7) | <0.01 | -15.4 (-28.4, -0.6) | -16.3 (-26.9, -6.4) | 0.61 | -7.6 (-22.5, 9.7) | -10.8 (-22.2, -0.1) | 0.12 |
| Anterior compartment of thigh muscle density (%) | -4.0 (-12.1, 1.9) | -1.6 (-8.4, 6.9) | <0.01 | -3.9 (-9.9, 1.9) | -4.0 (-12.1, 0.8) | 0.90 | -0.8 (-6.4, 6.9) | -3.0 (-8.4, 1.1) | 0.03 |
| Medial compartment of thigh muscle size (%) | -1.9 (-17.1, 14.8) | -1.5 (-20.4, 16.2) | 0.82 | -1.6 (-12.9, 14.8) | -2.4 (-17.1, 13.0) | 0.69 | -1.3 (-20.4, 16.2) | -1.8 (-13.4, 11.0) | 0.87 |
| Medial compartment of thigh muscle density (%) | -4.8 (-16.8, 8.4) | -5.7 (-19.3, 9.1) | 0.50 | -3.9 (-10.3, 8.4) | -6.6 (-16.8, 2.2) | 0.04 | -5.5 (-19.3, 9.1) | -5.9 (-16.7, 6.3) | 0.88 |
| Posterior compartment of thigh muscle size (%) | -16.4 (-34.6, 17.6) | -12.4 (-25.3, -1.3) | 0.02 | -15.6 (-34.6, 17.6) | -17.9 (-33.7, -0.4) | 0.37 | -12.0 (-21.4, -1.3) | -13.1 (-25.3, -1.4) | 0.56 |
| Posterior compartment of thigh muscle density (%) | -20.3 (-45.1, 2.7) | -19.6 (-41.6, 6.7) | 0.76 | -17.8 (-33.5, 2.7) | -24.9 (-45.1, -4.4) | 0.02 | -16.8 (-34.3, 6.7) | -24.4 (-41.6, -10.4) | 0.02 |
| SAA (%) | 11.9 (-9.9, 49.8) | 6.4 (-6.7, 18.0) | <0.01 | 10.1 (-9.9, 47.8) | 15.2 (0.3, 49.8) | 0.14 | 5.8 (-6.7, 18.0) | 7.6 (-0.9, 16.1) | 0.37 |
| VAA (%) | 13.6 (-15.3, 59.4) | 5.7 (-5.9, 19.7) | <0.01 | 16.3 (-10.2, 59.4) | 8.5 (-15.3, 26.9) | 0.03 | 6.0 (-4.5, 19.7) | 5.0 (-5.9, 13.2) | 0.64 |
| TAA (%) | 12.2 (-9.2, 40.3) | 5.8 (-5.1, 19.1) | <0.01 | 12.7 (-9.2, 40.3) | 11.1 (-4.1, 32.4) | 0.58 | 6.0 (-5.1, 19.1) | 5.6 (-4.6, 12.1) | 0.86 |
| SAA, subcutaneous adipose area; VAA, visceral adipose area; TAA, total adipose area. | | | | | | | | | |

| Appendix Table A2. Association between baseline body composition and baseline HGS, baseline TUG, adjusted for baseline age, height, weight and type 2 diabetes | | | | | | | | |
| --- | --- | --- | --- | --- | --- | --- | --- | --- |
|  | Association with baseline HGS | | | | Association with baseline TUG | | | |
|  | Female  (n=72) | | Male  (n=48) | | Female  (n=72) | | Male  (n=48) | |
| Baseline muscle properties | OR (95% CI) | P value | OR (95% CI) | P value | OR (95% CI) | P value | OR (95% CI) | P value |
| Paraspinals muscle size | 1.28 (0.50, 3.29) | 0.61 | 0.62 (0.24, 1.57) | 0.31 | 1.29 (0.50, 3.34) | 0.59 | 1.08 (0.53, 2.19) | 0.83 |
| Paraspinals muscle density | 1.22 (0.62, 2.38) | 0.56 | 0.68 (0.29, 1.58) | 0.37 | 0.75 (0.37, 1.50) | 0.41 | 1.24 (0.57, 2.70) | 0.60 |
| Psoas major muscle size | 1.32 (0.50, 3.53) | 0.58 | 1.54 (0.45, 5.25) | 0.49 | 1.78 (0.67, 4.71) | 0.25 | 1.61 (0.62, 4.18) | 0.33 |
| Psoas major muscle density | 1.41 (0.75, 2.62) | 0.29 | 1.60 (0.65, 3.92) | 0.31 | 0.50 (0.24, 1.05) | 0.07 | 0.77 (0.39, 1.54) | 0.46 |
| Extensors muscle size | 1.26 (0.63, 2.52) | 0.51 | 0.74 (0.35, 1.60) | 0.45 | 1.77 (0.82, 3.79) | 0.15 | 0.97 (0.49, 1.89) | 0.92 |
| Extensors muscle density | 2.66 (1.22, 5.80) | 0.01 | 0.51 (0.21, 1.25) | 0.14 | 1.04 (0.53, 2.02) | 0.92 | 1.29 (0.66, 2.52) | 0.46 |
| External rotators muscle size | 0.68 (0.28, 1.68) | 0.40 | 1.17 (0.50, 2.76) | 0.71 | 1.42 (0.57, 3.53) | 0.45 | 0.73 (0.35, 1.53) | 0.40 |
| External rotators muscle density | 0.81 (0.43, 1.52) | 0.50 | 3.57 (0.91, 14.02) | 0.07 | 1.15 (0.61, 2.18) | 0.66 | 0.82 (0.36, 1.88) | 0.64 |
| Adductors muscle size | 2.00 (0.89, 4.50) | 0.10 | 1.91 (0.89, 4.07) | 0.10 | 1.78 (0.80, 3.97) | 0.16 | 0.97 (0.52, 1.83) | 0.92 |
| Adductors muscle density | 1.57 (0.84, 2.96) | 0.16 | 1.14 (0.51, 2.53) | 0.75 | 1.07 (0.58, 1.98) | 0.83 | 0.93 (0.47, 1.83) | 0.82 |
| Flexors muscle size | 2.21 (0.83, 5.86) | 0.11 | 0.88 (0.31, 2.50) | 0.81 | 1.23 (0.49, 3.09) | 0.66 | 0.64 (0.25, 1.61) | 0.34 |
| Flexors muscle density | 1.13 (0.66, 1.95) | 0.65 | 0.99 (0.45, 2.17) | 0.97 | 0.81 (0.47, 1.41) | 0.46 | 1.07 (0.55, 2.06) | 0.85 |
| Abductors muscle size | 0.93 (0.46, 1.90) | 0.85 | 1.19 (0.46, 3.03) | 0.72 | 1.83 (0.87, 3.85) | 0.11 | 1.31 (0.59, 2.91) | 0.51 |
| Abductors muscle density | 2.59 (1.26, 5.29) | <0.01 | 1.16 (0.38, 3.53) | 0.80 | 1.33 (0.71, 2.50) | 0.37 | 1.62 (0.60, 4.39) | 0.35 |
| Anterior compartment of thigh muscle size | 1.64 (0.51, 5.30) | 0.41 | 1.34 (0.56, 3.20) | 0.51 | 3.51 (0.98, 12.56) | 0.05 | 1.08 (0.51, 2.26) | 0.85 |
| Anterior compartment of thigh muscle density | 1.29 (0.72, 2.28) | 0.39 | 1.16 (0.42, 3.26) | 0.77 | 0.80 (0.44, 1.47) | 0.47 | 0.78 (0.35, 1.74) | 0.55 |
| Medial compartment of thigh muscle size | 1.01 (0.48, 2.10) | 0.99 | 0.76 (0.35, 1.62) | 0.47 | 1.01 (0.47, 2.17) | 0.98 | 0.78 (0.42, 1.45) | 0.44 |
| Medial compartment of thigh muscle density | 1.31 (0.78, 2.21) | 0.31 | 0.75 (0.32, 1.73) | 0.50 | 0.96 (0.57, 1.63) | 0.87 | 1.46 (0.71, 3.01) | 0.30 |
| Posterior compartment of thigh muscle size | 0.97 (0.47, 2.01) | 0.94 | 0.95 (0.48, 1.89) | 0.88 | 1.56 (0.73, 3.32) | 0.25 | 1.17 (0.65, 2.10) | 0.60 |
| Posterior compartment of thigh muscle density | 2.30 (1.24, 4.27) | <0.01 | 0.43 (0.15, 1.26) | 0.12 | 1.07 (0.61, 1.87) | 0.82 | 1.41 (0.65, 3.02) | 0.38 |
| Baseline adipose tissue |  |  |  |  |  |  |  |  |
| SAA | 0.60 (0.29, 1.25) | 0.17 | 2.32 (0.72, 7.45) | 0.16 | 1.28 (0.62, 2.62) | 0.50 | 0.64 (0.25, 1.62) | 0.34 |
| VAA | 0.88 (0.41, 1.86) | 0.73 | 0.36 (0.09, 1.42) | 0.14 | 0.73 (0.34, 1.57) | 0.42 | 0.37 (0.14, 1.00) | 0.05 |
| TAA | 0.62 (0.26, 1.44) | 0.26 | 0.86 (0.28, 2.63) | 0.80 | 0.92 (0.41, 2.07) | 0.83 | 0.34 (0.12, 0.99) | 0.04 |
| BMI, body mass index; TUG, the Timed Up and Go test; HGS, handgrip strength; CI, confidence interval; SAA, subcutaneous adipose area; VAA, visceral adipose area; TAA, total adipose area. | | | | | | | | |

| Appendix Table A3. Longitudinal association between percent changes in body composition and percent changes in HGS, in TUG, adjusted for baseline age, height, weight and type 2 diabetes | | | | | | | | |
| --- | --- | --- | --- | --- | --- | --- | --- | --- |
|  | Association with percent changes in HGS | | | | Association with percent changes in TUG | | | |
|  | Female  (n=72) | | Male  (n=48) | | Female  (n=72) | | Male  (n=48) | |
| Percent changes in muscle properties | OR (95% CI) | P value | OR (95% CI) | P value | OR (95% CI) | P value | OR (95% CI) | P value |
| Paraspinals muscle size | 1.25 (0.77, 2.04) | 0.37 | 1.51 (0.68, 3.32) | 0.31 | 0.99 (0.59, 1.66) | 0.96 | 1.85 (0.85, 4.06) | 0.12 |
| Paraspinals muscle density | 1.50 (0.93, 2.41) | 0.09 | 0.96 (0.37, 2.50) | 0.94 | 1.49 (0.90, 2.45) | 0.12 | 1.56 (0.62, 3.96) | 0.35 |
| Psoas major muscle size | 1.90 (1.11, 3.28) | 0.02 | 2.47 (0.90, 6.75) | 0.08 | 1.39 (0.81, 2.37) | 0.23 | 1.34 (0.60, 3.02) | 0.47 |
| Psoas major muscle density | 1.47 (0.89, 2.42) | 0.14 | 0.37 (0.15, 0.95) | 0.04 | 1.64 (0.93, 2.90) | 0.09 | 1.22 (0.58, 2.55) | 0.60 |
| Extensors muscle size | 1.13 (0.71, 1.80) | 0.61 | 1.10 (0.43, 2.84) | 0.84 | 0.87 (0.52, 1.46) | 0.60 | 1.26 (0.52, 3.07) | 0.61 |
| Extensors muscle density | 1.19 (0.75, 1.88) | 0.46 | 0.78 (0.24, 2.52) | 0.67 | 0.99 (0.59, 1.64) | 0.96 | 1.08 (0.36, 3.29) | 0.89 |
| External rotators muscle size | 1.10 (0.66, 1.85) | 0.71 | 1.30 (0.62, 2.74) | 0.49 | 1.07 (0.61, 1.88) | 0.82 | 1.55 (0.77, 3.12) | 0.22 |
| External rotators muscle density | 1.03 (0.67, 1.58) | 0.88 | 0.60 (0.22, 1.63) | 0.32 | 1.62 (0.98, 2.69) | 0.06 | 0.64 (0.24, 1.74) | 0.38 |
| Adductors muscle size | 1.27 (0.78, 2.09) | 0.34 | 1.43 (0.66, 3.08) | 0.36 | 1.01 (0.60, 1.69) | 0.99 | 1.01 (0.48, 2.10) | 0.99 |
| Adductors muscle density | 0.85 (0.50, 1.43) | 0.54 | 1.19 (0.52, 2.72) | 0.69 | 1.09 (0.63, 1.87) | 0.76 | 2.08 (0.84, 5.14) | 0.11 |
| Flexors muscle size | 1.25 (0.76, 2.06) | 0.38 | 2.04 (0.93, 4.50) | 0.08 | 0.98 (0.58, 1.67) | 0.95 | 0.82 (0.42, 1.61) | 0.57 |
| Flexors muscle density | 1.27 (0.78, 2.05) | 0.34 | 1.15 (0.48, 2.78) | 0.75 | 1.28 (0.76, 2.17) | 0.35 | 1.17 (0.48, 2.86) | 0.74 |
| Abductors muscle size | 1.98 (1.17, 3.34) | 0.01 | 1.91 (0.79, 4.58) | 0.15 | 1.33 (0.80, 2.19) | 0.27 | 0.94 (0.43, 2.06) | 0.88 |
| Abductors muscle density | 1.31 (0.78, 2.22) | 0.31 | 0.65 (0.27, 1.59) | 0.34 | 0.91 (0.54, 1.52) | 0.71 | 0.75 (0.32, 1.77) | 0.51 |
| Anterior compartment of thigh muscle size | 2.01 (1.10, 3.67) | 0.02 | 1.96 (0.88, 4.36) | 0.10 | 2.21 (1.16, 4.24) | 0.02 | 1.07 (0.53, 2.13) | 0.85 |
| Anterior compartment of thigh muscle density | 0.96 (0.57, 1.62) | 0.87 | 0.98 (0.46, 2.10) | 0.96 | 0.81 (0.46, 1.43) | 0.47 | 1.48 (0.67, 3.24) | 0.33 |
| Medial compartment of thigh muscle size | 0.96 (0.55, 1.66) | 0.88 | 1.81 (0.90, 3.63) | 0.10 | 1.23 (0.67, 2.25) | 0.50 | 0.88 (0.48, 1.60) | 0.67 |
| Medial compartment of thigh muscle density | 0.87 (0.49, 1.55) | 0.64 | 1.12 (0.63, 2.00) | 0.70 | 1.14 (0.61, 2.12) | 0.68 | 0.81 (0.46, 1.42) | 0.46 |
| Posterior compartment of thigh muscle size | 0.63 (0.39, 1.01) | 0.06 | 1.02 (0.37, 2.79) | 0.97 | 0.92 (0.59, 1.46) | 0.73 | 0.82 (0.30, 2.22) | 0.69 |
| Posterior compartment of thigh muscle density | 0.57 (0.32, 1.02) | 0.06 | 1.70 (0.84, 3.43) | 0.14 | 0.78 (0.43, 1.42) | 0.42 | 0.76 (0.39, 1.49) | 0.43 |
| Percent changes in adipose tissue |  |  |  |  |  |  |  |  |
| SAA | 0.88 (0.56, 1.37) | 0.57 | 0.83 (0.27, 2.56) | 0.75 | 0.71 (0.42, 1.18) | 0.19 | 0.80 (0.26, 2.42) | 0.69 |
| VAA | 0.81 (0.51, 1.27) | 0.35 | 1.19 (0.35, 4.01) | 0.78 | 0.45 (0.25, 0.81) | <0.01 | 0.41 (0.11, 1.49) | 0.18 |
| TAA | 0.90 (0.57, 1.41) | 0.64 | 1.12 (0.35, 3.54) | 0.85 | 0.48 (0.27, 0.86) | 0.01 | 0.51 (0.15, 1.71) | 0.28 |
| BMI, body mass index; TUG, the Timed Up and Go test; HGS, handgrip strength; CI, confidence interval; SAA, subcutaneous adipose area; VAA, visceral adipose area; TAA, total adipose area. | | | | | | | | |
